# Supplementary material
Source: PubMed Central journal article supplement (PMC3552001)
Supplement: NIHMS430746-supplement-1_si_002.pdf [file NIHMS430746-supplement-1_si_002.pdf]

**Elevated Copper Binding Strength of Amyloid- $\beta$  Aggregates Enables Their Copper Sequestration from Albumin: a Pathway to Accumulation of Copper in Senile Plaques**

*Dianlu Jiang<sup>a,#</sup>, Lin Zhang<sup>a,#</sup>, Gian Paola G. Grant<sup>a</sup>, Christopher G. Dudzik<sup>b</sup>, Shu Chen<sup>a</sup>,  
Sveti Patel<sup>a</sup>, Yuanqiang Hao<sup>a</sup>, Glenn L. Millhauser<sup>b</sup>, and Feimeng Zhou<sup>a,\*</sup>*

<sup>a</sup>: Department of Chemistry and Biochemistry, California State University, Los Angeles,  
Los Angeles, California 90032

<sup>b</sup>: Department of Chemistry and Biochemistry, University of California, Santa Cruz,  
Santa Cruz, California 95064

**Summary of reported binding affinities of A $\beta$  peptides.** The measured binding affinities of A $\beta$  scatter across an extremely wide range in literature (Table S1). In early reports, usually the reported affinity constants were not corrected for the buffer effect and many other experimental factors, hence the reported  $K_d$  values are higher (although Bush and coworkers reported an attomolar  $K_d$  value,<sup>1</sup> an exceedingly small value). In recent years, the reported values are usually corrected for the buffer effect and more carefully measured by taking into considerations of the detection and sample pretreatment methods. The buffer-corrected  $K_d$  values are now confined within a much narrower range (typically from nM to sub-nM; although the study by Sarell et al.<sup>2</sup> reported a  $K_d$  value of 60 pM for the A $\beta$ (1–42) monomer). We also contrasted in Table S1 the methods to deduce the  $K_d$  values and the sample pretreatment protocols. As can be seen, essentially all of the fluorescence-based measurements rely on the determination of the intrinsic fluorescence of the sole Tyr residue at position 10 of the various A $\beta$  peptides. Also notice that HEPES is the most commonly employed buffer given its low Cu(II) binding strength.

**Table S1. Binding constants of representative A $\beta$  peptides and methods used**

| Peptide          | $K_d$                                | pH  | Buffer                | Method                             | Pretreatment             | ref. |
|------------------|--------------------------------------|-----|-----------------------|------------------------------------|--------------------------|------|
| A $\beta$ (1-16) | 1.0 $\mu$ M<br>(71 nM) <sup>a</sup>  | 7.4 | 10 mM PBS             | Direct Tyr. fl.                    | n/a                      | 3    |
| A $\beta$ (1-16) | 0.4 $\mu$ M<br>(28 nM) <sup>a</sup>  | 7.4 | 10 mM PBS             | Competitive Tyr fl.                | n/a                      | 3    |
| A $\beta$ (1-16) | ~ 0.3 nM                             | 7.4 | 20 mM PIPES           | ITC                                | Water, centrifuged       | 4    |
| A $\beta$ (1-16) | 0.1 $\mu$ M                          | 7.8 | Water                 | Competitive Tyr fl.                | n/a                      | 5    |
| A $\beta$ (1-16) | 0.7 nM                               | 7.2 | 20 mM HEPES           | ITC                                | n/a                      | 6    |
| A $\beta$ (1-16) | 47 $\mu$ M<br>(54 nM) <sup>a</sup>   | 7.4 | 100 mM Tris           | Direct Tyr fl.                     | n/a                      | 7    |
| A $\beta$ (1-16) | 0.3 nM                               | 7.4 | 20 mM HEPES           | ITC                                | n/a                      | 8    |
| A $\beta$ (1-16) | 0.3 nM                               | 7.4 | 20 mM PIPES           | ITC                                | n/a                      | 8    |
| A $\beta$ (1-16) | 0.09/0.1 $\mu$ M                     | 7.4 | 50 mM HEPES           | ITC/direct and competitive Tyr fl. | n/a                      | 9    |
| A $\beta$ (1-28) | 23 $\mu$ M<br>(1.7 nM) <sup>b</sup>  | 7.4 | 20 mM ACES            | ITC                                | n/a                      | 10   |
| A $\beta$ (1-28) | 70 nM                                | 7.4 | 50 mM HEPES           | ITC                                | n/a                      | 9    |
| A $\beta$ (1-28) | 10-100 nM                            | 7.8 | Water                 | CD/Competitive Tyr. fl.            | n/a                      | 11   |
| A $\beta$ (1-28) | 110 pM                               | 7.6 | Water                 | CD                                 | n/a                      | 2    |
| A $\beta$ (1-28) | 28 $\mu$ M<br>(32 nM) <sup>b</sup>   | 7.5 | 100 mM Tris           | Direct Tyr fl.                     | HFIP                     | 7    |
| A $\beta$ (1-28) | 2.5 $\mu$ M<br>(77 nM) <sup>b</sup>  | 7.2 | 10 mM HEPES           | Competitive Tyr fl.                | NaOH                     | 12   |
| A $\beta$ (1-40) | 0.9 $\mu$ M<br>(24 nM) <sup>b</sup>  | 7.4 | 50 mM HEPES           | Direct Tyr fl.                     | HFIP                     | 13   |
| A $\beta$ (1-40) | 0.5 $\mu$ M<br>(13 nM) <sup>b</sup>  | 7.4 | 50 mM HEPES           | Competitive Tyr fl.                | HFIP                     | 13   |
| A $\beta$ (1-40) | 1.6 $\mu$ M<br>(73 nM) <sup>b</sup>  | 7.4 | 10 mM Tris            | Direct Tyr fl.                     | n/a                      | 14   |
| A $\beta$ (1-40) | ~ 0.5 nM                             | 7.4 | 20 mM PIPES           | ITC                                | NaOH, centrifuged        | 4    |
| A $\beta$ (1-40) | 11 $\mu$ M<br>(12 nM) <sup>b</sup>   | 7.5 | 100 mM Tris           | Direct Tyr fl.                     | HFIP                     | 7    |
| A $\beta$ (1-40) | 1.6 $\mu$ M                          | 7.3 | 5 mM Phosphate buffer | NMR                                | n/a                      | 15   |
| A $\beta$ (1-40) | 8 $\mu$ M<br>(120 nM) <sup>b</sup>   | 7.4 | 50 mM PBS             | Direct Tyr fl.                     | n/a                      | 16   |
| A $\beta$ (1-40) | 0.4 nM                               | 7.4 | 20 mM HEPES           | ITC                                | NaOH, centrifuged        | 8    |
| A $\beta$ (1-40) | 1.1 nM                               | 7.2 | 20 mM PIPES           | ITC                                | NaOH, centrifuged        | 8    |
| A $\beta$ (1-40) | 5 nM                                 | 7.4 | 20 mM Tris            | CMCA                               | Water, centrifuged       | 1    |
| A $\beta$ (1-40) | 57 nM <sup>b</sup>                   | 7.4 | 50 mM HEPES           | Tyr fl.                            | n/a                      | 17   |
| A $\beta$ (1-42) | 6-60 pM                              | 7.4 | Water                 | Competitive Tyr fl.                | In NaOH, rocked for 48 h | 2    |
| A $\beta$ (1-42) | 0.7 $\mu$ M<br>(50 nM) <sup>a</sup>  | 7.4 | 10 mM PBS             | Direct Tyr.fl.                     | NaOH                     | 3    |
| A $\beta$ (1-42) | 2 $\mu$ M<br>(91 nM) <sup>b</sup>    | 7.4 | 10 mM Tris            | Direct Tyr fl.                     | n/a                      | 14   |
| A $\beta$ (1-42) | 0.007 pM                             | 7.4 | 20 mM Tris            | CMCA                               | Water, centrifuged       | 1    |
| A $\beta$ (1-42) | 0.76 $\mu$ M<br>(48 nM) <sup>b</sup> | 7.4 | 20 mM HEPES           | Direct Tyr fl.                     | HFIP                     | 13   |

a:  $K_d$  corrected by us with the eq. S2

b:  $K_d$  corrected by references (18 and 19)

ACES: *N*-(2-Acetamido)-2-aminoethanesulfonic acid); PIPES: piperazine-*N,N'*-bis(2-ethanesulfonic acid); Tris: tris(hydroxymethyl)aminomethane.

fl: Fluorescence; ITC: isothermo titration calorimetry (ITC); CD: Circular Dichroism; CMC: Competitive metal capture analysis

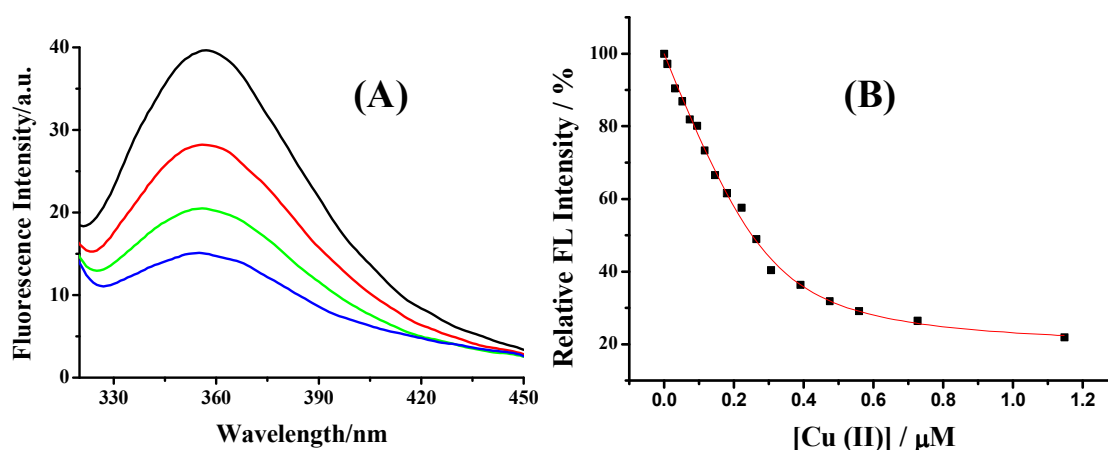

Figure S1. (A) Fluorescence emission spectra of 0.5  $\mu\text{M}$   $\text{A}\beta(1-16)(\text{Y10W})$  probe without (black curve) and with addition of  $\text{Cu}(\text{II})$  at different concentrations: 0.20 (red curve), 0.30 (green curve), and 0.47  $\mu\text{M}$  (blue curve). (B) The relative fluorescence intensity (solid squares) and the fitted curve (red line) against  $\text{Cu}(\text{II})$  concentration in 500 mM HEPES buffer (pH 7.4).

**Determination of the copper binding constant of the probe.** To determine the apparent binding constant of  $\text{A}\beta(1-16)(\text{Y10W})$  at different aggregation times, the  $\text{Cu}(\text{II})$  binding constant of the  $\text{A}\beta(1-42)$  probe was measured first. Figure S1A shows the fluorescence spectra of the probe when titrated with  $\text{Cu}(\text{II})$ . The fluorescence intensity decreases with increasing  $\text{Cu}(\text{II})$  concentrations, showing a behavior identical to that of  $\text{A}\beta(1-16)$  or  $\text{A}\beta(1-42)$ .<sup>3,11</sup> The fluorescence of  $\text{A}\beta(1-16)(\text{Y10W})$  is over five times stronger than that of  $\text{A}\beta(1-16)$  (see also Figure S10), allowing a more accurate binding constant to be measured. Shown in Fig. S1B are the relative fluorescence intensity (solid squares) at 360 nm and the fitted curve (red curve) against the amount of  $\text{Cu}(\text{II})$  titrant. The change of the probe fluorescence upon  $\text{Cu}(\text{II})$  binding correlates well with the amount of  $\text{A}\beta(1-$

16)(Y10W)–Cu(II) complex formed. Thus, the apparent binding constant,  $K'_{app}$ , of A $\beta$ (1–16)(Y10W)–Cu(II) can be determined from the fluorescence intensity as a function of the total Cu(II) concentration, [L], using eq. S1.<sup>3, 20</sup>

$$\Delta F = F_0 - F_L = \frac{F_0 - F_\infty}{2[M_0]} \left[ \left( [L] + [M_0] + \frac{1}{K'_{app}} \right) - \left( \left( [L] + [M_0] + \frac{1}{K'_{app}} \right)^2 - 4[M_0][L] \right)^{1/2} \right] \quad (S1)$$

where  $F_0$  and  $F_L$  are the fluorescence intensities of the probe in the absence and presence of CuCl<sub>2</sub>, respectively.  $F_\infty$  is the fluorescence intensity of a solution in which the probe is saturated with CuCl<sub>2</sub> and no further quenching occurs.  $[M_0]$  is the concentration of the probe binding site, taken to be equal to the A $\beta$ (1–16)(Y10W) concentration, as it is commonly known that under most circumstances Cu(II) forms a 1:1 complex with monomeric A $\beta$  *in vitro*. From the fit,  $K_{app}$  of A $\beta$ (1–16)(Y10W) to Cu(II) was determined be  $7.5 \times 10^6 \text{ M}^{-1}$  in 500 mM HEPES buffer or  $1.7 \times 10^6 \text{ M}^{-1}$  in 10 mM phosphate buffer. The  $K_{app}$  value of A $\beta$ (1–16)(Y10W) in the phosphate buffer is highly comparable to our previously reported values for A $\beta$ (1–42) ( $1.4 \times 10^6 \text{ M}^{-1}$ ) and A $\beta$ (1–16) ( $1.0 \times 10^6 \text{ M}^{-1}$ ) under the same condition.<sup>3</sup> The similar binding strengths suggest that Cu(II) would be equally allocated between the A $\beta$ (1–16)(Y10W) probe and monomeric A $\beta$ (1–42).

To measure the probe binding constant more accurately we used a high concentration of HEPES (500 mM) and a low probe concentration for titration so that buffer would compete with the probe for copper.<sup>21</sup> Under the condition that the HEPES concentration is six orders of magnitude greater than the A $\beta$ (1–16)(Y10W) concentration, the buffer effect<sup>21</sup> needs to be corrected. The binding constant  $K'$  (reciprocal of dissociation constant  $K_d$ ) is corrected with the following equation, with the  $C$  term known at a given buffer concentration:<sup>22</sup>

$$\log K' = \log K_{\text{app}} + C \quad (\text{S2})$$

In this work, the only time when the HEPES buffer effect is important is for the measurement of the Cu(II) binding affinity constant (i.e., the case shown in Figure S1). This is because the measurement is more accurate when the probe concentration is closer to the dissociation constant of its Cu(II) complex. An even lower probe concentration would be better, but the fluorescence signal becomes difficult to detect. The  $K_{\text{app}}$  value of  $7.5 \times 10^6 \text{ M}^{-1}$  detected in 500 mM HEPES was corrected to be  $3.1 \times 10^9 \text{ M}^{-1}$  using eq S2.

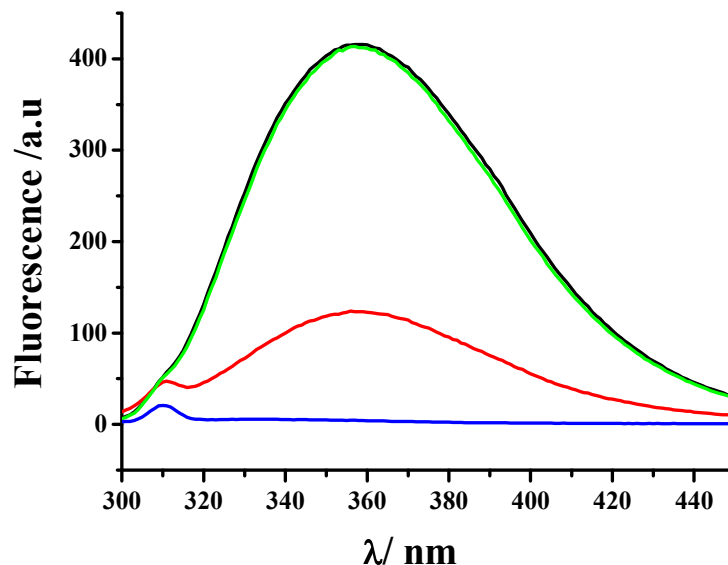

Figure S2. Fluorescence spectra collected from 10 mM HEPES buffer (blue curve), 12.5  $\mu\text{M}$  A $\beta$ (1–16)(Y10W) in 10 mM HEPES (black), a mixture of 12.5  $\mu\text{M}$  A $\beta$ (1–16)(Y10W) and 12.5  $\mu\text{M}$  Cu(II) (red), and a mixture containing 12.5  $\mu\text{M}$  each of A $\beta$ (1–16)(Y10W), Cu(II), and EDTA (green).

**Removal of Cu(II) in the A $\beta$ (1–16)(Y10W)–Cu(II) complex by a stronger copper chelator (EDTA) fully recovers the fluorescence.** Figure S2 shows an overlay of

fluorescence spectra collected from 10 mM HEPES buffer (blue curve) and 12.5  $\mu\text{M}$   $\text{A}\beta(1-16)(\text{Y10W})$  in 10 mM HEPES buffer (black). In the HEPE buffer, only the water Raman peak was observed at 313 nm (vide infra), whereas the  $\text{A}\beta(1-16)(\text{Y10W})$  probe exhibits an emission peak at 360 nm. Addition of  $\text{Cu}(\text{II})$  significantly decreases the probe fluorescence. In the mixture comprising  $\text{A}\beta(1-16)(\text{Y10W})$ ,  $\text{Cu}(\text{II})$ , and EDTA (12.5  $\mu\text{M}$  each), the fluorescence intensity is the same as that of the  $\text{A}\beta(1-16)(\text{Y10W})$ -only solution. Therefore, in the presence of a stronger  $\text{Cu}(\text{II})$  chelator,  $\text{Cu}(\text{II})$  bound by  $\text{A}\beta(1-16)(\text{Y10W})$  can be completely removed, demonstrating that  $\text{A}\beta(1-16)(\text{Y10W})$  can serve as an excellent probe to report on  $\text{Cu}(\text{II})$  sequestration by  $\text{A}\beta(1-42)$  monomers and aggregates.

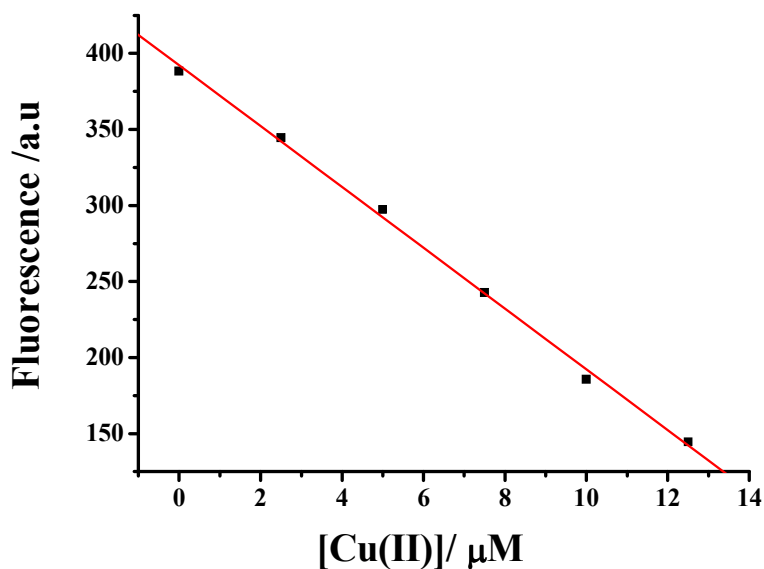

Figure S3. Titration of 12.5  $\mu\text{M}$   $\text{A}\beta(1-16)(\text{Y10W})$  with  $\text{Cu}(\text{II})$  in 10 mM HEPES ( $R^2 = 0.995$ ).

**Buffer effect on the binding constant measurement.** HEPES is usually regarded as a weak ligand to copper with a binding constant of  $1.6 \times 10^3 \text{ M}^{-1}$ .<sup>8, 21, 23</sup> Such a value is much

lower than that of  $A\beta(1-16)(Y10W)$  or  $A\beta(1-42)$ . The effect of HEPES on the measurement of the  $Cu(II)$  binding constant of the  $A\beta(1-16)(Y10W)$  probe is not significant even when the HEPES concentration is three orders of magnitude greater than that of the probe. At the concentration used for all of the fluorescence competitive assays presented in the main text (10 mM), HEPES is simply a spectator compound. Indeed, the fluorescence signal of 12.5  $\mu M$   $A\beta(1-16)(Y10W)$  in 10 mM HEPES exhibits a linear decrease versus the amount of  $Cu(II)$  up to one equivalent (Figure S3). The linear relationship confirms that  $Cu(II)$  titrated into this solution is essentially all bound to the probe. Furthermore, in the competitive assays, the total ligand concentration,  $[A\beta(1-16)(Y10W)] + [A\beta(1-42)]$ , is more than twice as high as the total  $Cu(II)$  concentration. Consequently, little  $Cu(II)$  remain in solution for binding with HEPES.

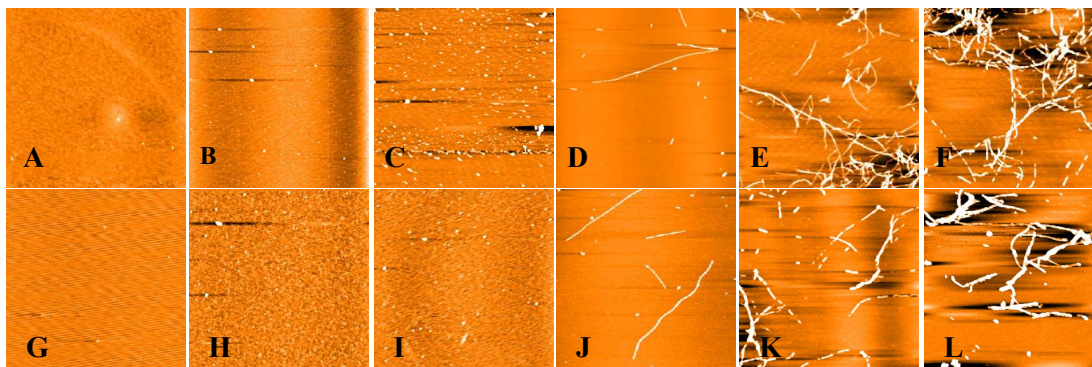

Figure S4. AFM images of an incubated 12.5  $\mu M$   $A\beta(1-42)$  solution (top row) and 12.5  $\mu M$   $A\beta(1-42)$  co-incubated with equimolar  $A\beta(1-16)(Y10W)$  (bottom row). These incubations were carried out at 37  $^{\circ}C$  and aliquots were withdrawn at 0, 20, 50, 180, 1440 and 2880 min and cast onto mica sheets. The image areas are all 5  $\mu m \times 5 \mu m$ .



The morphologies of A $\beta$ (1–42) incubated in the presence and absence of A $\beta$ (1–16)(Y10W). Juxtaposed in Figure S4 are AFM images sampled at different times from an incubated A $\beta$ (1–42) solution (top row) and those from an A $\beta$ (1–42) solution co-incubated with A $\beta$ (1–16)(Y10W) (bottom row). Apparently the A $\beta$ (1–16)(Y10W) probe does not affect the aggregation pathway and kinetics of A $\beta$ (1–42).

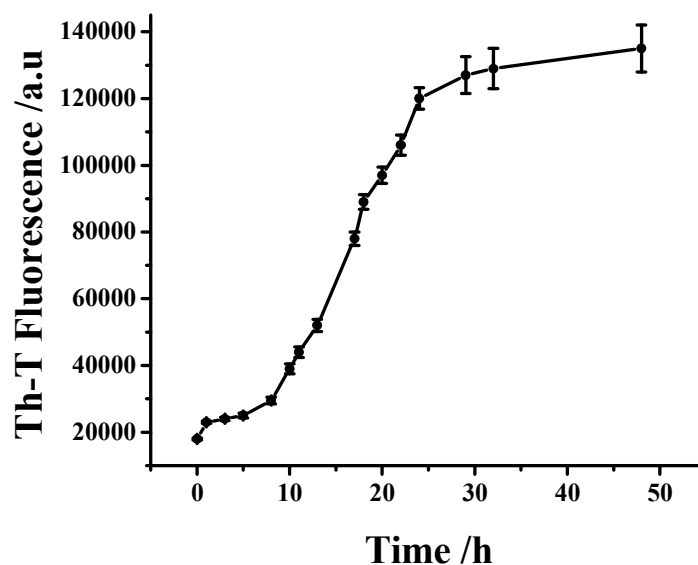

Figure S5. A $\beta$ (1–42) aggregation monitored with the ThT assay. At different incubation times, 80  $\mu$ L of 12.5  $\mu$ M A $\beta$ (1–42) was withdrawn and mixed with 320  $\mu$ L of a 10 mM HEPES buffer (pH 7.4) solution containing 20  $\mu$ M ThT. Fluorescence signals were measured using a Fluorolog 3 spectrofluorometer (Horiba Jobin Yvon, Edison, NJ) with slit widths of 2 nm and excitation and emission wavelengths at 450 and 480 nm, respectively. Each data point is the average of three replicate measurements.

**Thioflavin-T (ThT) assay.** The fibrillation process of A $\beta$ (1–42) was monitored with the ThT assay (Figure S5). The trend is similar to those shown by other studies<sup>24, 25</sup> and a recent work by us<sup>26</sup>. The presence of a lag phase is indicative of a lack of aggregation-initiating nuclei (relatively large structural oligomers or “aggregation units”) in the early stage of the A $\beta$ (1–42) incubation, confirming that the HFIP-treated A $\beta$ (1–42) sample contains only monomers. Notice that the plateau in Figure S5 (ca. 24 h) is consistent with the time when fibrils were observed by AFM (cf. the inset of Figure 2 at 1440 min). The trend depicted in Figure S5 is in contrast to that in Figure 2, which displays an increase of the  $K$  value even at 20 min from the inception of the incubation. This difference again suggests that low-mass oligomers (which are too small to serve as nuclei) bind more strongly than the A $\beta$ (1–42) monomer.

**Derivation of the apparent Cu(II) binding constant of a mixture of aggregates.** All of the A $\beta$ (1–42) aggregates are capable of binding Cu(II). We therefore define the apparent binding affinity constant ( $K$ ) of an aggregate mixture by using the formal concentration of the A $\beta$ (1–42) monomer. This  $K$  value can be derived from changes in the fluorescence intensity of the probe-Cu(II) complex at different aggregation times (states).

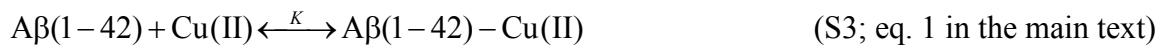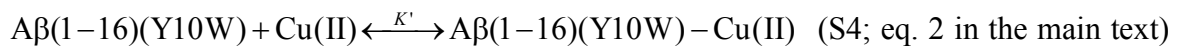

$$K = \frac{[\text{A}\beta(1-42) - \text{Cu(II)}]}{[\text{A}\beta(1-42)][\text{Cu(II)}]} \quad (\text{S5})$$

$$K' = \frac{[\text{A}\beta(1-16)(\text{Y10W}) - \text{Cu(II)}]}{[\text{A}\beta(1-16)(\text{Y10W})][\text{Cu(II)}]} \quad (\text{S6})$$

$K$  changes with the aggregation time, but  $K'$  remains constant because  $A\beta(1-16)(Y10W)$  does not aggregate. Let  $\theta_w$  be the percentage of  $Cu(II)$ -binding  $A\beta(1-16)Y10W$  and  $\theta$  be the percentage of  $Cu(II)$ -binding  $A\beta(1-42)$ , then:

$$\theta = \frac{K[Cu(II)]}{1 + K[Cu(II)]} \quad (S7)$$

$$\text{and } \theta_w = \frac{K'[Cu(II)]}{1 + K'[Cu(II)]} \quad (S8)$$

Mass balance leads to the following equation:

$$[Cu(II)] + [A\beta(1-16)(Y10W)-Cu(II)] + [A\beta(1-42)-Cu(II)] = [Cu(II)]_T \quad (S9)$$

where  $[Cu(II)]_T$  represents the total  $Cu(II)$  concentration. In eq. S9,  $Cu(II)$  bound by HEPES is neglected because the amount of  $Cu(II)$  complex of HEPES is insignificant (vide supra).

Solving for  $[Cu(II)]$ , the following can be derived:

$$[Cu(II)] = \frac{\theta_w}{K'(1-\theta_w)} \quad (S10)$$

Plugging eq. S10 into eq. S7,  $\theta$  can be solved:

$$\theta = \frac{K[Cu(II)]}{1 + K[Cu(II)]} = \frac{K \frac{\theta_w}{K'(1-\theta_w)}}{1 + K \frac{\theta_w}{K'(1-\theta_w)}} = \frac{K\theta_w}{K'(1-\theta_w) + K\theta_w} \quad (S11)$$

Letting the initial concentrations of  $A\beta(1-42)$  and  $A\beta(1-16)(Y10W)$ , and the total concentration of  $Cu(II)$  be  $A$ ,  $L_0$  and  $C$ , respectively, and substituting these terms into eq. S9 gives

$$\frac{\theta_w}{K'(1-\theta_w)} + \theta_w L_0 + A \frac{K\theta_w}{K'(1-\theta_w) + K\theta_w} = C \quad (S12)$$

$K$  therefore can be obtained by rearranging eq. S12:

$$K = \frac{[K'(1-\theta_w)(C-\theta_w L_0)-\theta_w](1-\theta_w)K'}{K' A \theta_w (1-\theta_w) - \theta_w [K'(1-\theta_w)(C-\theta_w L_0) - \theta_w]} \quad (\text{S13; eq. 3 in the main text})$$

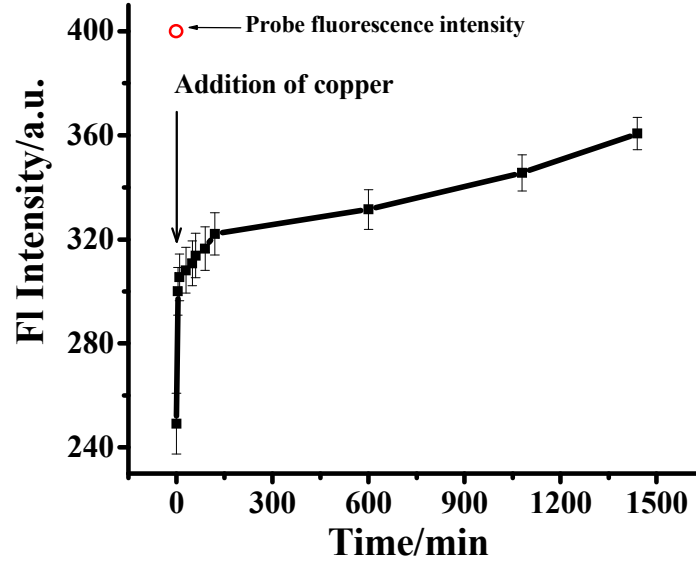

Figure S6. Recovery of the  $A\beta(1-16)(Y10W)$  fluorescence monitored continuously in a single solution of  $A\beta(1-42)$ ,  $A\beta(1-16)(Y10W)$ , and  $Cu(II)$  while being incubated in a quartz cuvette. The concentration of  $Cu(II)$ ,  $A\beta(1-42)$  and  $A\beta(1-16)(Y10W)$  was all  $12.5 \mu\text{M}$ . Each data point is the average of three replicate measurements. The empty red circle corresponds to the fluorescence signal in a mixture of  $12.5 \mu\text{M}$   $A\beta(1-16)(Y10W)$  and  $12.5 \mu\text{M}$   $A\beta(1-42)$ .

**Continuous fluorescence monitoring of a single solution of  $A\beta(1-16)(Y10W)$ ,  $Cu(II)$ , and  $A\beta(1-42)$ .** Instead of making multiple solutions by mixing the  $A\beta(1-16)(Y10W)$  probe with aliquots withdrawn from a continuously incubated  $Cu(II)/A\beta(1-42)$  solution (i.e., the experiment shown by Figure 4), the probe fluorescence variation can be continuously monitored in a single solution that also contains  $A\beta(1-42)$  and  $Cu(II)$ .

Specifically, into a cuvette containing 400  $\mu\text{L}$  of 12.5  $\mu\text{M}$   $\text{A}\beta(1-16)(\text{Y10W})$  and 12.5  $\mu\text{M}$   $\text{A}\beta(1-42)$ , 10  $\mu\text{L}$  of 500  $\mu\text{M}$   $\text{Cu}(\text{II})$  was spiked. As shown in Figure S6, immediately after the addition of  $\text{Cu}(\text{II})$ , the probe fluorescence was quenched from the level denoted by the red circle to a much lower level (ca. 250). The quenched fluorescence was recovered to almost 30% of the initially quenched value within the first 10 min, suggesting that a rapid redistribution of  $\text{Cu}(\text{II})$  between the probe and  $\text{A}\beta(1-42)$  had been established. Thereafter, the fluorescence signal increases more gradually as the  $\text{A}\beta(1-42)$  oligomerization and fibrillation occurs. At 24 h or 1440 min, the fluorescence recovered to about 80% of the initially quenched value. This coincides with the time when fibrils appear in solution (cf. Figure 2A and the inset). Beyond 24 h, the fluorescence signal begins to fluctuate due to the light scattering by fibrils and large aggregates (see also description in the main text).

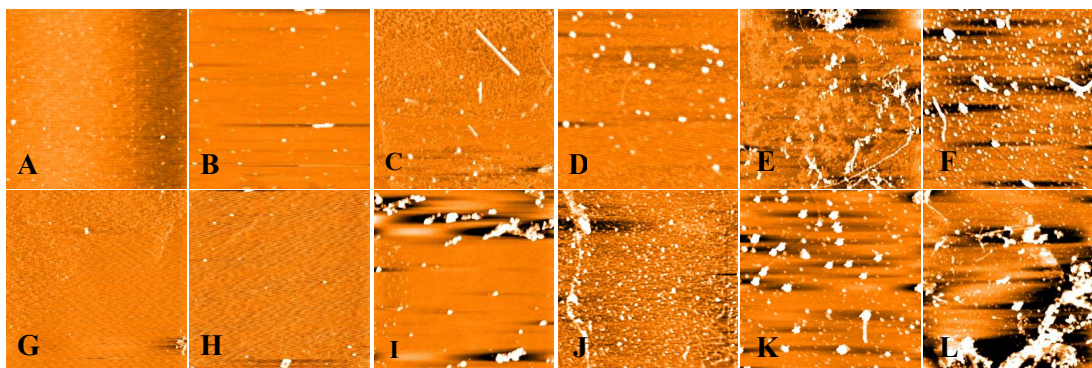

Figure S7. AFM images of 12.5  $\mu\text{M}$   $\text{A}\beta(1-42)$  co-incubated with equimolar  $\text{Cu}(\text{II})$  (top row) and with equimolar amounts of  $\text{A}\beta(1-16)(\text{Y10W})$  and  $\text{Cu}(\text{II})$  (bottom row). The incubation temperature was 37  $^{\circ}\text{C}$  and aliquots were withdrawn at 0, 20, 50, 180, 1440 and 2880 min. The image areas are all 5  $\mu\text{m} \times 5 \mu\text{m}$ .

**The morphologies of A $\beta$ (1–42) incubated in the presence and absence of A $\beta$ (1–16)(Y10W) and Cu(II).** Figure S7 displays AFM images of A $\beta$ (1–42) co-incubated with Cu(II) (top row) and A $\beta$ (1–42) co-incubated with A $\beta$ (1–16)(Y10W) and Cu(II) (bottom row). The presence of copper leads to amorphous aggregate formation. Compared to Figure 4 in the main text, it is evident that A $\beta$ (1–16)(Y10W) does not change the A $\beta$ (1–42) aggregation pathways and kinetics.

**Determination of the copper binding constant ( $K$ ) of aggregated A $\beta$ (1–42) by competitive EPR binding assay.** For a competitive EPR binding assay to be successful, the two Cu(II) competing ligands should not have drastically different binding constants. Moreover, ideally their main EPR peaks and/or hyperfine peaks should be at different positions so that quantitative measurements of the Cu(II) transfer can be made. We attempted to observe possible transfer between A $\beta$ (1–42) aggregates and a number of copper binding molecules (e.g., nitrilotriacetic acid, the oxidized form of glutathione, a pentapeptide of sequence Ac-GGGGG, and  $\alpha$ -synuclein) and found that they do not behave as well as the HSA–Cu(II) system, which is also the most biologically relevant source of copper among all of the species we studied.

We estimated the copper binding constant ( $K$ ) of aggregated A $\beta$ (1–42) by deconvoluting the two components in curve D (cf. Figure 5 in the main text) to yield a ratio of Cu(II) bound to HSA versus that complexed by the A $\beta$ (1–42) aggregates. In all cases, Cu(II) and HSA concentrations were 49 and 61  $\mu$ M, respectively. Such a competitive assay was successfully applied by Millhauser and coworkers to studies of copper binding by peptides derived from the prion protein sequence.<sup>27</sup> Relative to HSA

whose copper binding constant is  $1 \times 10^{12} \text{ M}^{-1}$ ,<sup>22</sup> the estimated  $K$  value of pre-incubated A $\beta$  (from curve D) is  $1.7 \times 10^{11} \text{ M}^{-1}$ , which is in good agreement with the value deduced from our fluorescence measurement ( $0.8 \times 10^{11} \text{ M}^{-1}$ ). In contrast, the  $K$  value of monomeric A $\beta$ (1–42) estimated from curve B is  $1.1 \times 10^{10} \text{ M}^{-1}$ , a value one order of magnitude smaller than that of the A $\beta$ (1–42) aggregates and three times smaller than that obtained from our fluorescence method. It is important to note that the actual  $K$  of a freshly prepared A $\beta$ (1–42) at the higher A $\beta$ (1–42) concentration necessary for EPR might be overestimated, owing to the increased propensity to form oligomers in a more concentrated solution. In addition, inevitably there is also some delay between the sample preparation and the EPR measurement, which could also lead to formation of a small amount of soluble A $\beta$ (1–42) oligomers (i.e., similar to those identified by the red curve in Figure 3). We should also mention that the accuracy of the binding constant value estimated from the EPR measurements is also dependent on the extent of dispersion of the copper-containing A $\beta$ (1–42) aggregates inside the EPR tubes. As incubation prolongs, more aggregates are formed and the likelihood their sedimentation out of the EPR detection window increases. Indeed we observed that the loss of the total copper signal is more pronounced at longer A $\beta$ (1–42) incubation times. An underestimate of the  $K$  values is expected for A $\beta$ (1–42) samples incubated for 6 h or longer due to precipitation. Nevertheless, both the EPR spectra shown in Figure 4 and the binding constants estimated from the competitive EPR assay (cf. Table S2) have unequivocally validated the increased binding affinity associated with aggregated A $\beta$ (1–42).

**Table S2. Cu(II) binding constants of A $\beta$ (1–42) estimated from competitive assays**

| A $\beta$ (1–42) concentration ( $\mu$ M) | Incubation time at 37 °C (h) | $K \times 10^{10} \text{ M}^{-1}$ |
|-------------------------------------------|------------------------------|-----------------------------------|
| 76                                        | 0                            | 3.3                               |
| 76                                        | 6                            | 22.7                              |
| 76                                        | 24                           | 16.4                              |
| 306                                       | 0                            | 2.2                               |
| 306                                       | 6                            | 20.0                              |
| 306                                       | 24                           | 22.7                              |

**Comparative studies of A $\beta$ (1–42) samples treated with different protocols.** A $\beta$ (1–42) is prone to aggregation, and care should be taken to eliminate oligomers or seeds that can accelerate the aggregation and fibrillation processes in the early stage of an incubation or during titration. Different methods have been developed to treat commercial or homemade A $\beta$ (1–42) samples. As shown in Table S1, most studies resort to the method developed by Teplow and coworkers<sup>28</sup> or the method of dissolving preexisting oligomers with HFIP followed by removal of insoluble particles.<sup>7, 18</sup> We noticed that the sample pretreatment method used by Sarell et al.<sup>2</sup> is different from all other studies and might have at least partially contributed to the rather low  $K_d$  value for the A $\beta$ (1–42) monomer. We followed this method by shaking A $\beta$ (1–42) stock solution at 5 °C for 48 h and found that a large amount of oligomers (Fig. S8A) were present in the stock solution. This is in contrast to the HFIP-treated sample which showed few globular oligomers (Figure S8B). Quenching of the Tyr-10 fluorescence by Cu(II) (Figure S9A) and recovery of the quenched fluorescence by glycine (Figure S9B) are also different between samples treated with these two methods. In 10 mM HEPES and at 50  $\mu$ M (a concentration much higher than the  $K_d$  values of A $\beta$  peptides), Cu(II) is not bound by HEPES and a linear dependence of the fluorescence intensity on the Cu(II) concentration is expected (cf.



Figure S3). It is clear from Figure S9A, the data collected from an A $\beta$ (1–16) solution (green curve) and the HFIP-treated A $\beta$ (1–42) solution (red curve) depict better linearity than that from the A $\beta$ (1–42) solution treated with the method of Sarell et al.<sup>2</sup> (black curve). The deviation from linearity can be ascribed to the presence of oligomers in the solution which accelerates the precipitation upon copper binding(cf. Figure S8A). This conclusion is further supported by the fluorescence competitive assay using glycine (a Cu(II) chelator) as a competitive ligand. As shown in Figure S9B, The half maximal quenching values obtained with the HFIP-treated A $\beta$ (1–42) sample, A $\beta$ (1–42) treated with the Sarell method,<sup>2</sup> and A $\beta$ (1–16) are 12, 60 (which is comparable to that reported in Reference 2), and 10, respectively. It is evident that the Cu(II) binding affinity of the HFIP-treated A $\beta$ (1–42) sample is closer to that of A $\beta$ (1–16) than to that of the A $\beta$ (1–42) sample treated with the method by Sarell et al. Furthermore, the quenched A $\beta$ (1–16) fluorescence is almost completely recovered with the addition of excess glycine, while the fluorescence recovery of the HFIP-treated A $\beta$ (1–42) is greater than that of the A $\beta$ (1–42) sample treated with the Sarell method. That in A $\beta$ (1–42) solutions the fluorescence signal did not fully recover can be reasoned to the presence of large aggregates formed during the titration with Cu(II) and the addition of glycine. We believe that some Cu(II)-containing aggregates may have precipitated, decreasing the Cu(II) ions available to glycine. Overall, the data presented in Figures S8 and S9 strongly suggest that sample treatment and assay methods are crucial to accurate determination of the binding constant of A $\beta$ (1–42) aggregates.

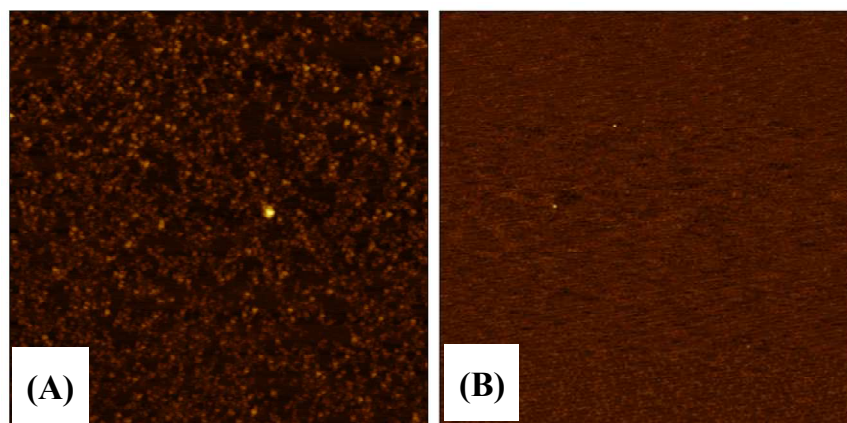

Figure S8. AFM images of A $\beta$ (1–42) treated with the method used by Sarell et al. (A) and with HFIP (B). The image areas are both 5  $\mu\text{m} \times 5 \mu\text{m}$ .

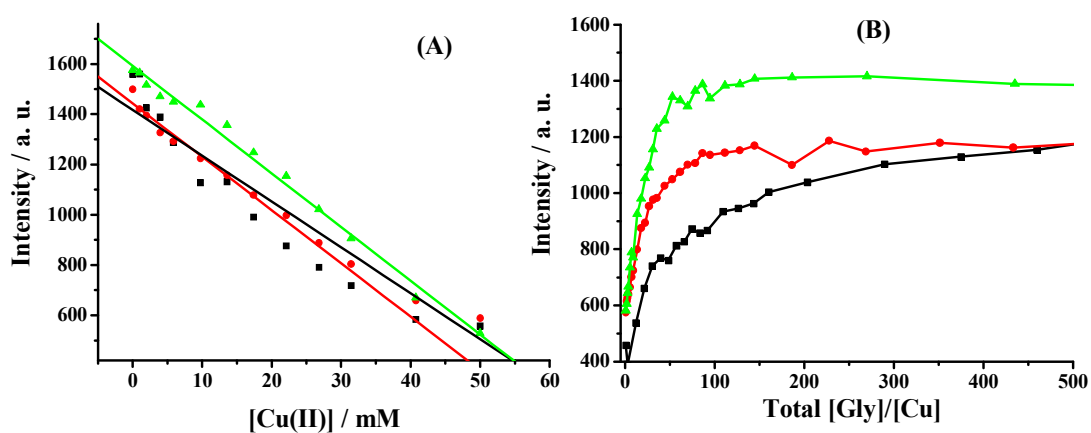

Figure S9. (A) Titrations of 50  $\mu\text{M}$  A $\beta$ (1–42) prepared from stock solutions treated with the method reported by Sarell et al. (black curve) and with the HFIP method (red) using Cu(II) as the titrant. For comparison, a 50  $\mu\text{M}$  A $\beta$ (1–16) sample was also titrated (green curve). Linear regressions of these plots yielded  $R^2$  values of  $-0.995$ ,  $-0.991$ , and  $-0.964$ , for A $\beta$ (1–16), HFIP-treated A $\beta$ (1–42), and A $\beta$ (1–42) treated with the Sarell method, respectively. (B) Additions of glycine immediately after the A $\beta$  solutions shown in (A) were titrated with Cu(II). The buffer system was 10 mM HEPES at pH 7.4 and the Tyr-10 fluorescence of these three species were monitored at 307 nm. A Hitachi 4600

spectrofluorimeter was used for the measurements with entrance and exit slit widths both set at 5 nm.

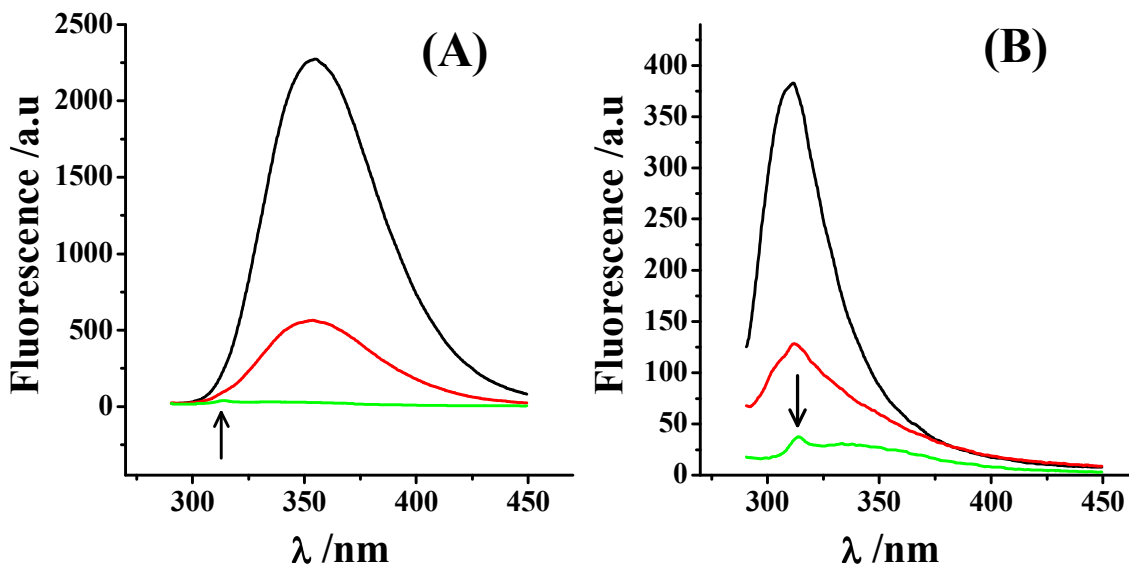

Figure S10. Fluorescence spectra of (A) 50  $\mu\text{M}$   $\text{A}\beta(1-16)(\text{Y10W})$  and (B) 50  $\mu\text{M}$   $\text{A}\beta(1-42)$  in 10 mM HEPES:  $\text{A}\beta(1-16)(\text{Y10W})$  or  $\text{A}\beta(1-42)$  alone (black curves) and  $\text{A}\beta(1-16)(\text{Y10W})$  or  $\text{A}\beta(1-42)$  with one equivalent of  $\text{Cu(II)}$  added (red curves). Spectra from the buffer are shown in green. A Hitachi 4600 spectrofluorimeter was used for the measurements with entrance and exit slit widths set at 2.5 and 5 nm, respectively. The arrows indicate the water Raman peak.

**Advantages of the  $\text{A}\beta(1-16)(\text{Y10W})$  probe for binding constant measurements.** The method resorting to measurements of the Try-10 fluorescence for  $\text{Cu(II)}$  binding constants suffers from the interference of the water Raman peak and low fluorescence signal. The latter is particularly pronounced when  $\text{Cu(II)}$  concentrations approach to the stoichiometric equivalent of the  $\text{A}\beta$  peptide at which the Tyr-10 fluorescence is quenched to the highest extent. As shown in Figure S10, the water Raman peak (ca. 313 nm) is in

close proximity of the Tyr fluorescence (307 nm). In contrast, the A $\beta$ (1–16)(Y10W) probe (emission at 360 nm) is farther away from the water Raman peak. Notice that, under the same experimental condition, the A $\beta$ (1–16)(Y10W) probe has a fluorescence intensity that is almost six times greater than the Tyr-10 of A $\beta$ (1–42).

### References:

- (1) Atwood, C. S., Scarpa, R. C., Huang, X. D., Moir, R. D., Jones, W. D., Fairlie, D. P., Tanzi, R. E. and Bush, A. I. (2000) Characterization of copper interactions with Alzheimer amyloid beta peptides: identification of an attomolar-affinity copper binding site on amyloid beta 1–42. *J. Neurochem.* 75, (3), 1219–1233.
- (2) Sarell, C. J., Syme, C. D., Rigby, S. E. J. and Viles, J. H. (2009) Copper(II) binding to amyloid-beta fibrils of Alzheimer's disease reveals a picomolar affinity: stoichiometry and coordination geometry are independent of A $\beta$  oligomeric form. *Biochemistry* 48, (20), 4388–4402.
- (3) Maiti, N. C., Jiang, D. L., Wain, A. J., Patel, S., Dinh, K. L. and Zhou, F. M. (2008) Mechanistic studies of Cu(II) binding to amyloid-beta peptides and the fluorescence and redox behaviors of the resulting complexes. *J. Phys. Chem. B* 112, (28), 8406–8411.
- (4) Hong, L. A., Carducci, T. M., Bush, W. D., Dudzik, C. G., Millhauser, G. L. and Simon, J. D. (2010) Quantification of the Binding Properties of Cu<sup>2+</sup> to the Amyloid Beta Peptide: Coordination Spheres for Human and Rat Peptides and Implication on Cu<sup>2+</sup>-Induced Aggregation. *J. Phys. Chem. B.* 114, (34), 11261–11271.

- (5) Ma, Q. F., Hu, J., Wu, W. H., Liu, H. D., Du, J. T., Fu, Y., Wu, Y. W., Lei, P., Zhao, Y. F. and Li, Y. M. (2006) Characterization of copper binding to the peptide amyloid-beta(1–16) associated with Alzheimer's disease. *Biopolymers* 83, (1), 20–31.
- (6) Hong, L., Bush, W. D., Hatcher, L. Q. and Simon, J. (2008) Determining thermodynamic parameters from isothermal calorimetric isotherms of the binding of macromolecules to metal cations originally chelated by a weak ligand. *J. Phys. Chem. B* 112, (2), 604–611.
- (7) Karr, J. W., Akintoye, H., Kaupp, L. J. and Szalai, V. A. (2005) N-terminal deletions modify the Cu<sup>2+</sup> binding site in amyloid-beta. *Biochemistry* 44, (14), 5478–5487.
- (8) Hatcher, L. Q., Hong, L., Bush, W. D., Carducci, T. and Simon, J. D. (2008) Quantification of the binding constant of copper(II) to the amyloid-beta peptide. *J. Phys. Chem. B* 112, (27), 8160–8164.
- (9) Guilloreau, L., Damian, L., Coppel, Y., Mazarguil, H., Winterhalter, M. and Faller, P. (2006) Structural and thermodynamical properties of Cu-II amyloid-beta 16/28 complexes associated with Alzheimer's disease. *J. Biol. Inorg. Chem.* 11, (8), 1024–1038.
- (10) Sacco, C., Skowronsky, R. A., Gade, S., Kenney, J. M. and Spuches, A. M. (2012) Calorimetric investigation of copper(II) binding to A beta peptides: thermodynamics of coordination plasticity. *J. Biol. Inorg. Chem.* 17, (4), 531–541.

- (11) Syme, C. D., Nadal, R. C., Rigby, S. E. J. and Viles, J. H. (2004) Copper binding to the amyloid-beta ( $A\beta$ ) peptide associated with Alzheimer's disease. *J. Biol. Chem.* 279, 18169–18177.
- (12) Danielsson, J., Pierattelli, R., Banci, L. and Graslund, A. (2007) High-resolution NMR studies of the zinc-binding site of the Alzheimer's amyloid beta-peptide. *FEBS J.* 274, (1), 46–59.
- (13) Tougu, V., Karafin, A. and Palumaa, P. (2008) Binding of zinc(II) and copper(II) to the full-length Alzheimer's amyloid-beta peptide. *J. Neurochem.* 104, (5), 1249–1259.
- (14) Garzon-Rodriguez, W., Yatsimirsky, A. K. and Glabe, C. G. (1999) Binding of Zn(II), Cu(II), and Fe(II) ions to Alzheimer's A beta peptide studied by fluorescence. *Bioorg. Med. Chem. Lett.* 9, (15), 2243–2248.
- (15) Hou, L. M. and Zagorski, M. G. (2006) NMR reveals anomalous copper(II) binding to the amyloid A beta peptide of Alzheimer's disease. *J. Am. Chem. Soc.* 128, (29), 9260–9261.
- (16) Raman, B., Ban, T., Yamaguchi, K., Sakai, M., Kawai, T., Naiki, H. and Goto, Y. (2005) Metal ion-dependent effects of clioquinol on the fibril growth of an amyloid beta peptide. *J. Biol. Chem.* 280, (16), 16157–16162.
- (17) Rozga, M., Klonecki, M., Dadlez, M. and Bal, W. (2010) A Direct determination of the dissociation constant for the Cu(II) complex of amyloid beta 1–40 peptide. *Chem. Res. Toxicol* 23, (2), 336–340.

- (18) Tougu, V., Karafin, A. and Palumaa, P. (2008) Binding of zinc(II) and copper(II) to the full-length Alzheimer's amyloid-beta peptide. *J. Neurochem.* 104, (5), 1249–1259.
- (19) Zawisza, I., Rozga, M. and Bal, W. (2012) Affinity of copper and zinc ions to proteins and peptides related to neurodegenerative conditions (A beta, APP, alpha-synuclein, PrP). *Coord. Chem. Rev.* 256, (19-20), 2297–2307.
- (20) Jackson, G. S., Murray, I., Hosszu, L. L. P., Gibbs, N., Waltho, J. P., Clarke, A. R. and Collinge, J. (2001) *Proc. Natl. Acad. Sci. USA* 98, 8531–8535.
- (21) Faller, P. and Hureau, C. (2009) Bioinorganic chemistry of copper and zinc ions coordinated to amyloid- $\beta$ peptide. *Dalton Trans.*, 1080–1094.
- (22) Bal, W., Christodoulou, J., Sadler, P. J. and Tucker, A. (1998) Multi-metal binding site of serum albumin. *J. Inorg. Biochem.* 70, (1), 33–9.
- (23) Sokołowska, M. and Bal, W. (2005) Cu(II) complexation by “non-coordinating” N-2-hydroxyethylpiperazine-N<sup>1</sup>-2-ethanesulfonic acid (HEPES buffer). *J. Inorg. Biochem.* 99, 1653–1660.
- (24) Bartolini, M., Naldi, M., Fiori, J., Valle, F., Biscarini, F., Nicolau, D. V. and Andrisano, V. (2011) Kinetic characterization of amyloid-beta 1–42 aggregation with a multimethodological approach. *Anal. Biochem.* 414, 215–225.
- (25) Sanders, H. M., Lust, R. and Teller, J. K. (2009) Amyloid-beta peptide A $\beta$ 3–42 affects early aggregation of full-length A $\beta$ 1–42. *Peptides* 30, 849–854.
- (26) Jiang, D., Rauda, I., Han, S., Chen, S. and Zhou, F. (2012) Aggregation Pathways of the Amyloid  $\beta$ (1–42) Peptide Depend on Its Colloidal Stability and Ordered  $\beta$ -Sheet Stacking. *Langmuir* 28 12711–12721.

- (27) Dudzik, C. G., Walter, E. D. and Millhauser, G. L. (2011) Coordination features and affinity of the  $\text{Cu}^{2+}$  site in the  $\alpha$ -synuclein protein of Parkinson's Disease. *Biochemistry* 50, 1771–1777.
- (28) Fezoui, Y., Hartley, D. M., Harper, J. D., Khurana, R., Walsh, D. M., Condron, M. M., Selkoe, D. J., Lansbury, P. T., Jr, Fink, A. L. and Teplow, D. B. (2000) An improved method of preparing the amyloid  $\beta$ -protein for fibrillogenesis and neurotoxicity experiments *Amyloid: Int. J. Exp. Clin. Invest.* 7, 166– 178.
